# Supplementary material for: A pipeline for complete characterization of complex germline rearrangements from long DNA reads
Source: Genome Med. 2020 Jul 31;12:67. doi: 10.1186/s13073-020-00762-1 (PMC7393826; doi:10.1186/s13073-020-00762-1)
Supplement: Supplementary file 3 — Additional file 3: Table S13. Comparison of the breakpoints. [file 13073_2020_762_MOESM3_ESM.xlsx]

## Sheet: TableS13
			Sanger results (vcf format discription)					dnarrange (lamassemble) (vcf format discription)						ngmlr-Sniffles						LAST-NanoSV
			chr	position	ref	alt		chr	position	ref	alt	difference to Sanger seq		chr	position	ref	alt	difference to Sanger seq		chr	position	ref	alt	difference to Sanger seq
Patient1	der(X)		chr2	65999177	A	A]chrX:108702801]		chr2	65999178	N	N]chrX:108702800]	a few nt gap		chr2	65998656	N	]chrX:108703328]N	opposite direction, ~516nt gap		chr2	65999176	C	C]chrX:108702797]	a few nt gap
			chrX	108702801	A	A]chr2:65999177]		chrX	108702800	N	N]chr2:65999178]			chr2	65999763	N	N[chrX:108702200[	opposite direction, ~591nt gap
	der(2)		chr2	65999172	A	[chrX:108702803[A		chr2	65999171	N	[chrX:108702802[N	a few nt gap		Not detected						chr2	65999175	G	[chrX:108702803[G	a few nt gap
			chrX	108702803	T	[chr2:65999172[T		chrX	108702802	N	[chr2:65999171[N
Patient2	der(X)		chrX	108192979	G	G]chr4:12235636]		chrX	108192979	N	N]chr4:12235636]	exact		chr4	12235198	N	N[chrX:108193458[	opposite direction, 439nt, -478nt gap		chr4	12235636	A	A]chrX:108192979]	exact
			chr4	12235636	A	A]chrX:108192979]		chr4	12235636	N	N]chrX:108192979]			chr4	12236119	N	N[chrX:108192476[	opposite direction, 482nt, 504nt gap
	der(4)		chrX	108197172	T	[chr4:12242666[T		chrX	108197171	N	[chr4:12242665[N	a few nt gap		chr4	12242202	N	]chrX:108197684]N	opposite direction, ~463nt gap		chr4	12242666	A	[chrX:108197172[A	exact
			chr4	12242666	A	[chrX:108197172[A		chr4	12242665	N	[chrX:108197171[N			chr4	12243126	N	]chrX:108196774]N	opposite direction, ~461nt gap
Patient3	der(7)	a	chr7	96748158	T	T[chr15:50520397[		chr7	96748159	N	N[chr15:50520396[	a few nt gap		Not detected						chr15	50520397	G	]chr7:96748158]G	exact
			chr15	50520397	G	[chr7:96748158[G		chr15	50520396	N	[chr7:96748159[N
	der(15)
		b	chr15	45084077	T	T[chr7:96748157[		chr15	45084077	N	N[chr7:96748156[	a few nt gap		chr7	96747640	N	N[chr15:50519970[	opposite direction??		chr15	45084077	T	T[chr7:96748160[	a few nt gap
			chr7	96748157	A	]chr15:45084077]A		chr7	96748156	N	]chr15:45084077]N			chr7	96747759	N	]chr15:45083676]N
														chr7	96748810	N	N[chr15:50521039[
		c	chr7	97319753	C	C[chr7:98126049[		chr7	97319753	N	N[chr7:98126048[	one nt gap		chr7	97319247	N	<DEL>,SVLEN=-806282	498nt, 520nt gap		chr7	97319753	C	<DEL>, SVLEN=806299	a few nt gap
			chr7	98126049	A	]chr7:97319753]A		chr7	98126048	N	]chr7:97319753]N
		d-1	chr7	98163102	A	A]chr15:49905364]		chr7	98163102	N	N]chr15:49905364]	exact		chr7	98162628	N	N[chr15:49905845[	opossite direction??		chr15	49905364	C	C]chr7:98163102]	exact
			chr15	49905364	C	C]chr7:98163102]		chr15	49905364	N	N]chr7:98163102]			chr7	98163635	N	N[chr15:49904837[
		d-2	chr15	49893590	T	]chr7:97449145]TT		chr15	49893590	N	]chr7:97449143]N	a few nt gap		chr7	97448665	N	N[chr15:49893143[	-567, 447nt gap		chr15	49893592	T	]chr7:97449145]T	a few nt gap
			chr7	97449145	C	CT[chr15:49893590[		chr7	97449143	N	N[chr15:49893590[			chr7	97449710	N	N[chr15:49894131[	-567, 459nt gap
		e-1	chr7	97319762	A	[chr15:49789339[A		chr7	97319761	N	[chr15:49789338[N	a few nt gap		chr7	97319310	N	]chr15:49789807]N			chr15	49789340	T	[chr7:97319762[T	exact
			chr15	49789339	C	[chr7:97319762[C		chr15	49789338	N	[chr7:97319761[N			chr7	97320276	N	]chr15:49788811]N
		e-2	chr15	49790859	T	TA]chr15:49919290]		chr15	49790859	N	N]chr15:49919290]	exact		chr15	49790238	N	<INV>, SVLEN=129656	621nt, -604nt gap		chr15	49790859	T	T]chr15:49919289]	one nt gap
			chr15	49919290	T	TA]chr15:49790859]		chr15	49919290	N	N]chr15:49790859]
		e-3	chr15	49905361	T	]chr15:49893591]T		chr15	49905360	N	]chr15:49893591]N	a few nt gap		Not detected						chr15	49893591	C	C[chr15:49905361[	exact
			chr15	49893591	C	C[chr15:49905361[		chr15	49893591	N	N[chr15:49905360[
		f	chr15	49824620	C	[chr15:49919292[C		chr15	49824619	N	[chr15:49919291[N	a few nt gap		chr15	49824184	N	<INV>, SVLEN=95541	436nt, -433nt gap		chr15	49824620	C	[chr15:49919294[C	a few nt gap
			chr15	49919292	C	[chr15:49824620[C		chr15	49919291	N	[chr15:49824619[N
		g	chr15	50520367	C	C[chr15:49790864[		chr15	50520367	N	N[chr15:49790863[	a few nt gap		chr15	49790296	N	<DUP>, SVLEN=729509	562nt, 568nt gap		chr15	49790865	C	]chr15:50520367]C	one nt gap
			chr15	49790864	T	]chr15:50520367]T		chr15	49790863	N	]chr15:50520367]N			chr15	49791274	N	<DUP>, SVLEN=729538	-445nt, 410nt gap
		h	chr15	49824619	C	C[chr7:98163104[		chr15	49824619	N	N[chr7:98163103[	a few nt gap		chr7	98162588	N	]chr15:49824121]N	516nt, 498nt gap		chr15	49824619	C	C[chr7:98163104[	exact
			chr7	98163104	A	]chr15:49824619]A		chr7	98163103	N	]chr15:49824619]N			chr7	98163677	N	]chr15:49825203]N	-573nt, -584nt gap
	der(9)	i	chr9	78120937	T	T[chr14:22801179[		chr9	78120934	N	N[chr14:22801178[	a few nt gap		chr9	78120437	N	N[chr14:22800681[	500nt, 498nt gap		chr14	22801179	A	]chr9:78120935]A	a few nt gap
			chr14	22801179	A	]chr9:78120937]A		chr14	22801178	N	]chr9:78120934]N							-602nt, -599nt gap
		j	chr4	65290822	T	T]chr14:24267175]		chr4	65290822	N	N]chr14:24267175]	exact		chr4	65290397	N	N[chr14:24267592[	425nt, -417nt gap
			chr14	24267175	C	C]chr4:65290822]		chr14	24267175	N	N]chr4:65290822]									chr14	24267175	C	C]chr4:65290820]	a few nt gap
		k	chr4	65390269	T	CCTGAAGTT[chr4:64511025[		chr4	65390267	N	N[chr4:64511024[	exact		chr4	64510517	N	<DUP>, SVLEN=879261	-17nt gap		chr4	64511025	T	]chr4:65390267]T	a few nt gap
			chr4	64511025	T	TTGAAGTCC[chr4:65390269[		chr4	64511024	N	]chr4:65390267]N			chr4	64511573	N	<DUP>, SVLEN=879221	23nt gap
		l	chr4	62793219	C	[chr4:65290820[C		chr4	62793218	N	[chr4:65290819[N	exact		chr4	62793636	N	<INV>, SVLEN=2496764	-417nt, 420nt gap		chr4	62793219	C	[chr4:65290820[C	exact
			chr4	65290820	C	[chr4:62793219[C		chr4	65290819	N	[chr4:62793218[N
		m	chr4	64511011	T	T[chr14:24267175[		chr4	64511011	N	N[chr14:24267175[	exact		Not detected						chr14	24267176	T	]chr4:64511011]T	one nt gap
			chr14	24267175	C	]chr4:64511011]C		chr14	24267175	N	]chr4:64511011]N
	der(4)	n	chr4	62793220	T	T[chr4:65396391[		chr4	62793220	N	N[chr4:65396390[	exact		Not detected						chr4	62793220	T	T[chr4:65396391[	exact
			chr4	65396391	G	]chr4:62793220]G		chr4	65396390	N	]chr4:62793220]N
	der(14)	o	chr14	22801173	C	C[chr9:78120937[		chr14	22801173	N	N[chr9:78120936[	one nt gap		chr9	78121539	N	]chr14:22801778]N	-602nt, -604nt gap		chr14	22801143	G	G[chr9:78120938[	a few nt gap
			chr9	78120937	T	]chr14:22801173]T		chr9	78120936	N	]chr14:22801173]N									chr14	22801158	G	G[chr9:78120939[	a few nt gap
																				chr14	22801173	C	C[chr9:78120937[	exact
Table S13. Comparison of the breakpoints detected by dnarrange, ngmlr-Sniffles and LAST-NanoSV to Sanger sequence-confirmed breakpoints.
Breakpoints were described according to vcf (variant call format) version 4.2 (https://cseweb.ucsd.edu/classes/sp16/cse182-a/notes/VCFv4.2.pdf). Note that in ngmlr-Sniffles and LAST-NanoSV, we only look for translocation sites (suggested by G-banded chromosomal analysis) because there is no method to filter out common/benign changes present in controls.
